# Supplementary material for: Effects of molecular weight-fractionated natural organic matter on the phytoavailability of silver nanoparticles
Source: Royal Society of Chemistry journal article supplement (doi:10.1039/c7en01173c), 2018-01-01
Supplement: c7en01173c1.pdf [file c7en01173c1.pdf]

1

## Electronic Supporting Information

2 **Effects of Molecular-Weight-Fractionated Natural Organic Matter on the**

3 **Phytoavailability of Silver Nanoparticles**

4 Min Li,<sup>ab</sup> Fei Dang,<sup>\*a</sup> Qing-Long Fu,<sup>c</sup> Dong-Mei Zhou<sup>a</sup> and Bin Yin<sup>d</sup>

5 <sup>a</sup> Key Laboratory of Soil Environment and Pollution Remediation, Institute of Soil Science, the

6 Chinese Academy of Sciences, Nanjing 210008, China

7 <sup>b</sup> University of Chinese Academy of Sciences, Beijing 100049, China

8 <sup>c</sup> Department of Civil and Environmental Engineering, Tokyo Institute of Technology, Tokyo 152-

9 8552, Japan

10 <sup>d</sup> State Key Laboratory of Soil and Sustainable Agriculture, Institute of Soil Science, the Chinese

11 Academy of Sciences, Nanjing 210008, China

12

13

14

15

16 <sup>\*</sup> Corresponding author, Tel: +86-25-86881179, Fax: +86-25-86881000.

17 E-mail: fdang@issas.ac.cn.

18

19 **Summary**

20 **11 SI pages containing 2 tables and 7 figures.**

## 22 **Contents**

|    |                                                                                          |          |
|----|------------------------------------------------------------------------------------------|----------|
| 23 | Detailed information of NOM (Table S1).....                                              | page S3  |
| 24 | The washing efficiencies of two washing methods (Table S2).....                          | page S4  |
| 25 | The linear pattern of total Ag uptake by rice over time (Figure S1).....                 | page S5  |
| 26 | AgNP characterizations (Figure S2).....                                                  | page S6  |
| 27 | TEM images and size distribution of AgNPs incubated with NOM (Figure S3) .....           | page S7  |
| 28 | Hydrodynamic diameters of NOM alone in the exposure medium (Figure S4) .....             | page S8  |
| 29 | Correlation between uptake rates and compositional differences (Figure S5) .....         | page S9  |
| 30 | The chemical structural formulas of the small-NOM models (Figure S6).....                | page S10 |
| 31 | The effects of the NOM concentration, the NOM fractionation, and the small-NOM models on |          |
| 32 | pH (Figure S7) .....                                                                     | page S11 |

34 **Table S1** Elemental composition and acidic functional groups of Suwannee River natural organic  
35 matter (NOM) as provided by the International Humic Substance Society (available at  
36 <http://humic-substances.org/#products>).

| Sample | H <sub>2</sub> O | Ash <sup>a</sup> | C    | H    | O     | N    | S    | P  | Carboxyl <sup>b</sup> | Phenolic <sup>c</sup> |
|--------|------------------|------------------|------|------|-------|------|------|----|-----------------------|-----------------------|
| NOM    | 5.69             | 4.01             | 50.7 | 3.97 | 41.48 | 1.27 | 1.78 | ND | 11.21                 | 2.47                  |

37 <sup>a</sup>: Percentage of inorganic residue (% w/w) in a dry sample.

38 <sup>b</sup>: Charge density (m<sub>eq</sub> g<sup>-1</sup> C) at pH 8.0.

39 <sup>c</sup>: Two times the change in the charge density (m<sub>eq</sub> g<sup>-1</sup> C) between pH 8.0 and pH 10.0.

40 ND: not determined.

41

43 **Table S2** Washing efficiencies of two washing methods (HNO<sub>3</sub> + L-cysteine and CaCl<sub>2</sub>). HNO<sub>3</sub> +  
 44 L-cysteine: tissues were soaked thoroughly in Milli-Q water for 10 min, rinsed with 10 mM HNO<sub>3</sub>,  
 45 soaked thoroughly in 10 mM of freshly prepared L-cysteine for 20 min, and finally rinsed with  
 46 Milli-Q water after soaking in AgNP medium for 2 or 10 min. CaCl<sub>2</sub>: tissues were soaked  
 47 thoroughly in Milli-Q water for 10 min, 10 mM CaCl<sub>2</sub> for 20 min, and finally rinsed with Milli-Q  
 48 water after soaking in AgNP medium for 2 or 10 min. Exposure medium condition: 10 mg AgNPs  
 49 L<sup>-1</sup> in 1/4 Hoagland's medium (pH 5.6 ± 0.1). The data are presented as the mean ± SD (n = 5).

|                                | CaCl <sub>2</sub><br>(2 min) | HNO <sub>3</sub> + L-cysteine<br>(2 min) | CaCl <sub>2</sub><br>(10 min) | HNO <sub>3</sub> + L-cysteine<br>(10 min) |
|--------------------------------|------------------------------|------------------------------------------|-------------------------------|-------------------------------------------|
| Ag in washing<br>solution (µg) | 9.32 ± 1.30                  | 12.40 ± 1.89                             | 12.20 ± 2.05                  | 13.88 ± 2.27                              |
| Ag remained in<br>tissue (µg)  | 3.66 ± 0.82                  | 2.90 ± 0.90                              | 4.31 ± 0.95                   | 2.93 ± 0.66                               |
| Ag removed<br>(%)              | 72.0 ± 2.00                  | 81.4 ± 2.80                              | 74.1 ± 2.08                   | 82.6 ± 2.22                               |

50

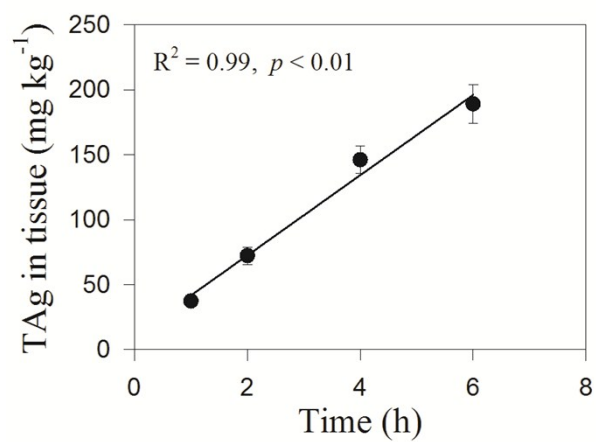

53

54 **Figure S1.** Linear pattern of the uptake of total Ag by rice over time. The data are presented as the  
55 mean  $\pm$  SD (n = 5). Exposure medium condition: 1 mg AgNPs L<sup>-1</sup> in 1/4 Hoagland's medium (pH  
56 5.6  $\pm$  0.1).

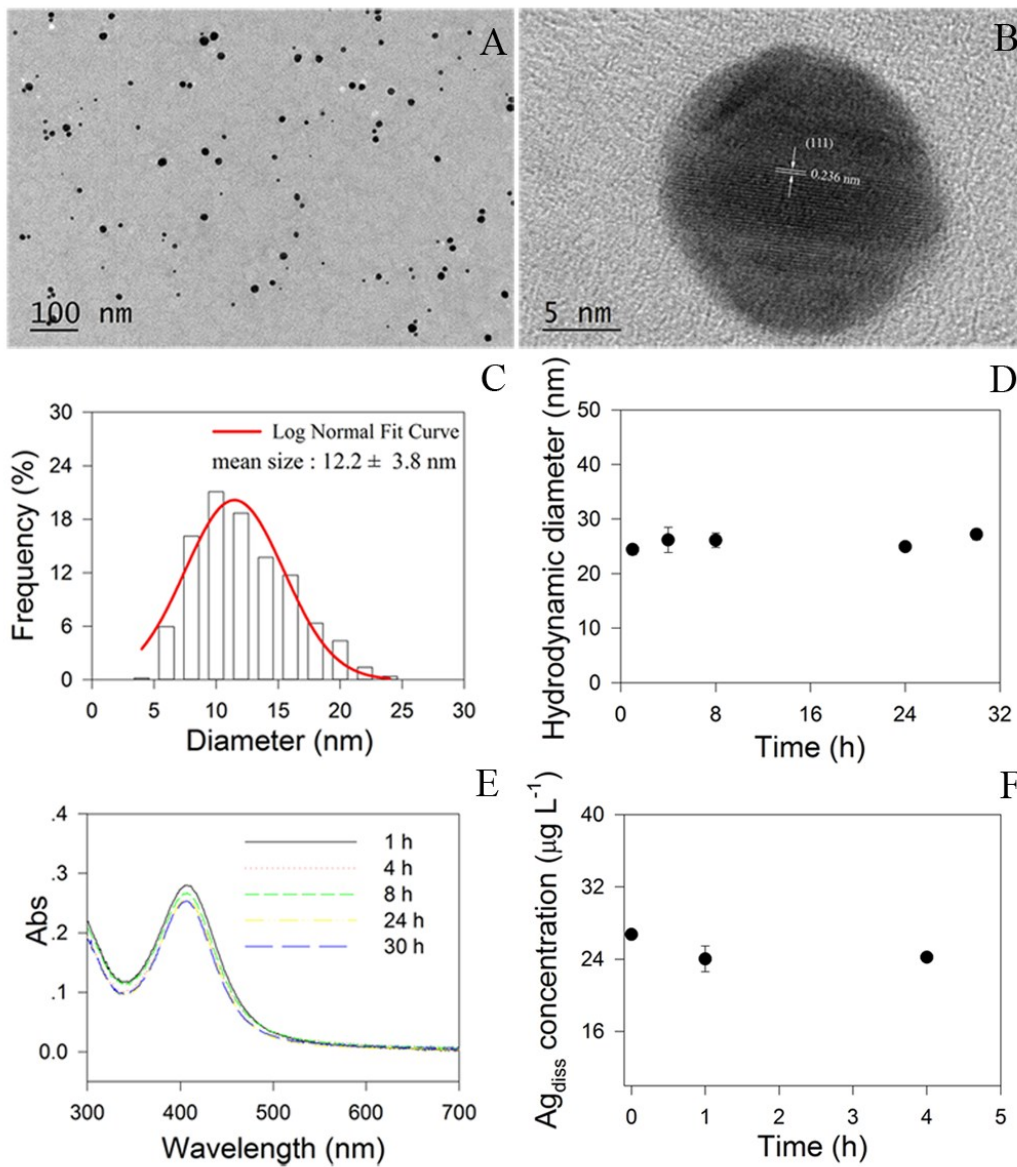

58

59 **Figure S2.** Representative transmission electron microscopy (TEM) image (A), high-resolution  
 60 TEM image (B), particle size distribution (C), number-weighted hydrodynamic diameters (D),  
 61 UV-Vis spectra (E), and dissolved Ag ( $\text{Ag}_{\text{diss}}$ ) concentration (F) of  $1 \text{ mg AgNPs L}^{-1}$  in 1/4  
 62 Hoagland's medium ( $\text{pH } 5.6 \pm 0.1$ ).

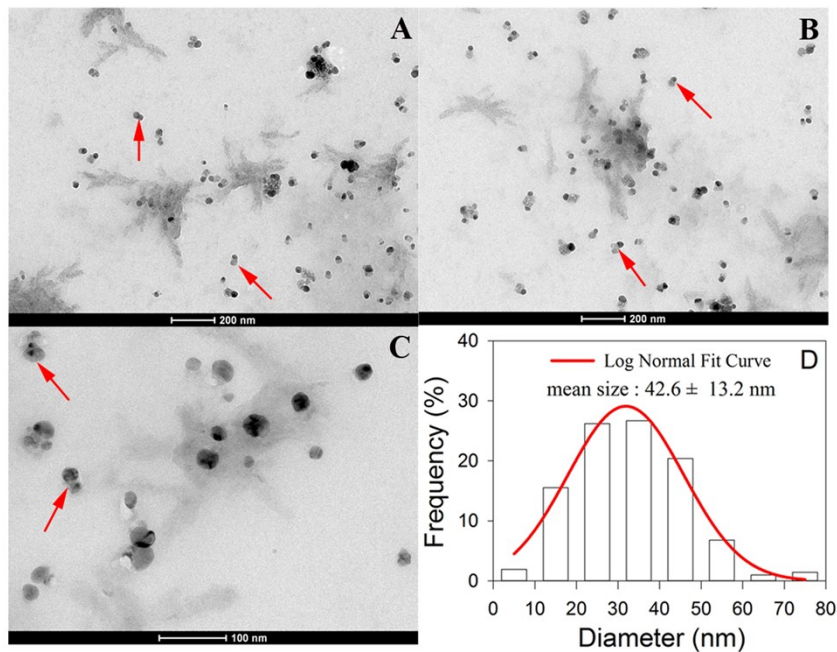

64

65 **Figure S3.** Representative TEM images (A, B, and C) and particle size distribution (D) of AgNPs  
 66 incubated with 80 mg L<sup>-1</sup> NOM. The AgNP concentration (5 mg L<sup>-1</sup>) was higher than that in the  
 67 exposure medium to satisfy the detection limit of TEM. Note that particle size distribution were  
 68 analyzed by 200 well-dispersed nanoparticles with NOM adsorption (as indicated in the selected  
 69 particles), while particles associated with large NOM aggregates were not considered.

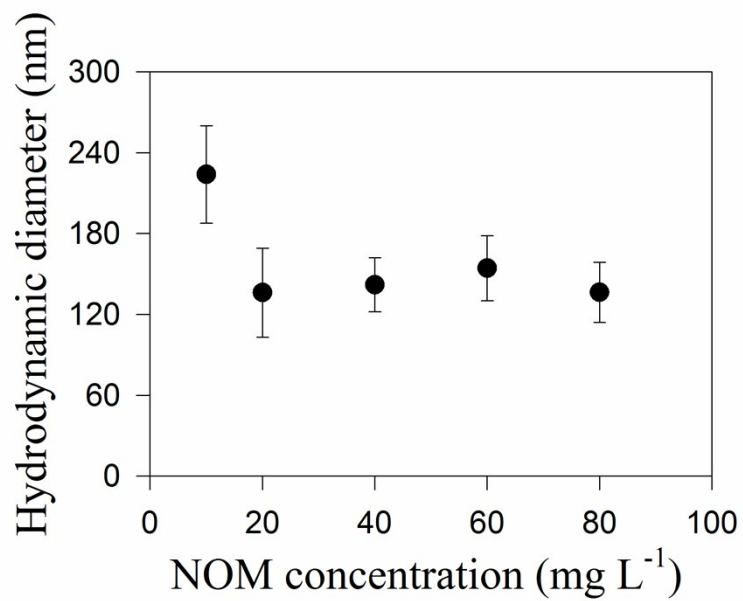

72

73 **Figure S4.** Number-weighted hydrodynamic diameters of NOM alone in the exposure medium:

74 1/4 Hoagland solution at pH 5.6. Samples were prepared using unfractionated NOM ranging from

75 10 to 80 mg L<sup>-1</sup>. The data are presented as the mean ± SD (n = 5).



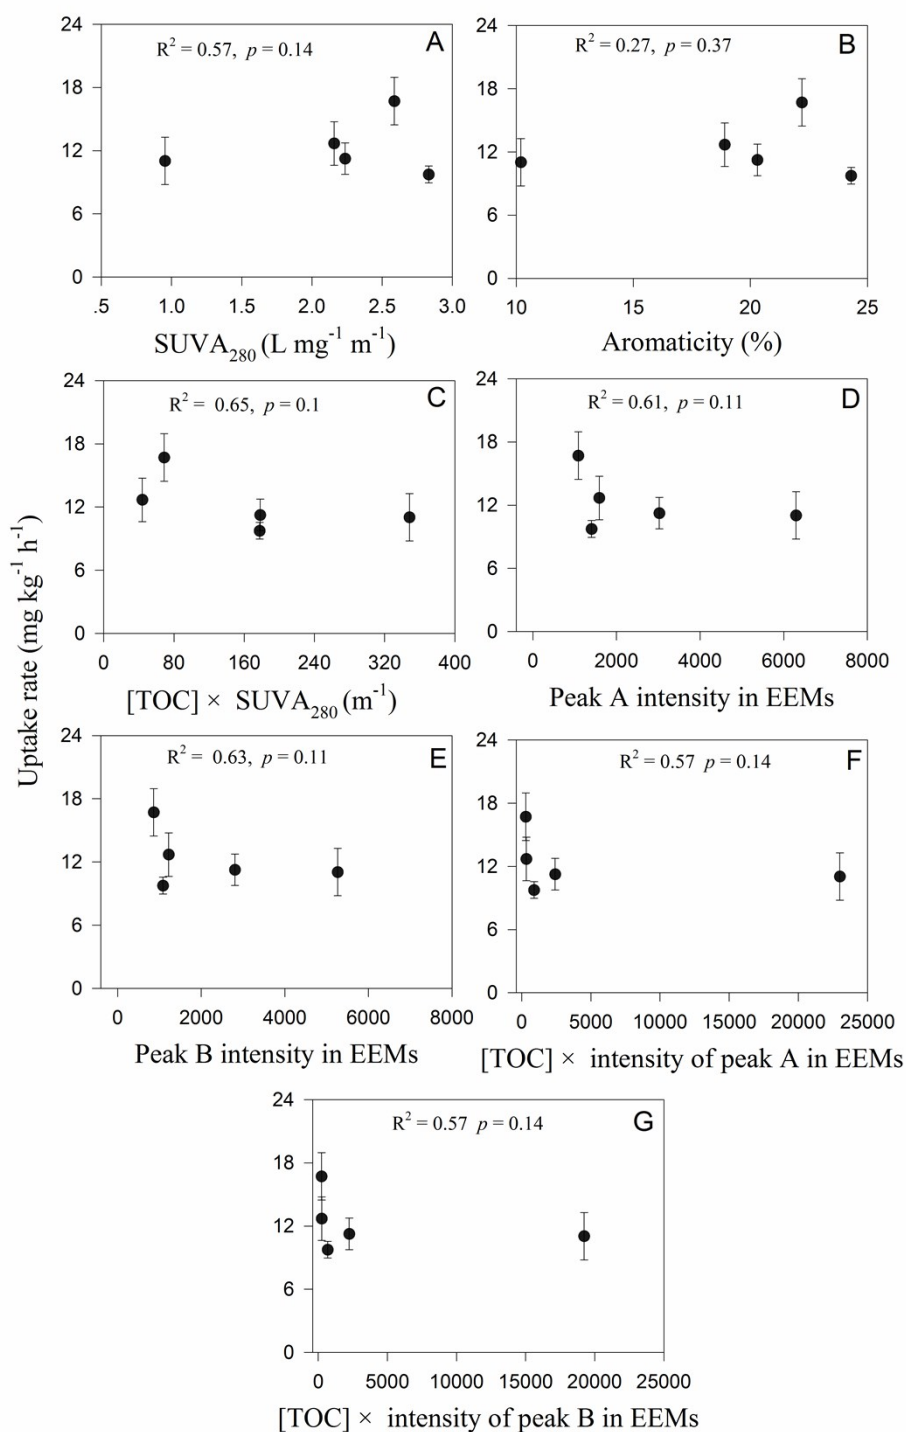

77

78 **Figure S5.** Correlation between total Ag uptake and the compositional differences in the NOM

79 fractions. A: specific ultraviolet absorbance at 280 nm (SUVA<sub>280</sub>), B: aromaticity, C: [TOC] ×

80 SUVA<sub>280</sub>, D: peak A intensity in the excitation-emission matrix spectra (EEMs), E: peak B

81 intensity in the EEMs, F: [TOC] × intensity of peak A in EEMs, G: [TOC] × intensity of peak B in

82 EEMs.

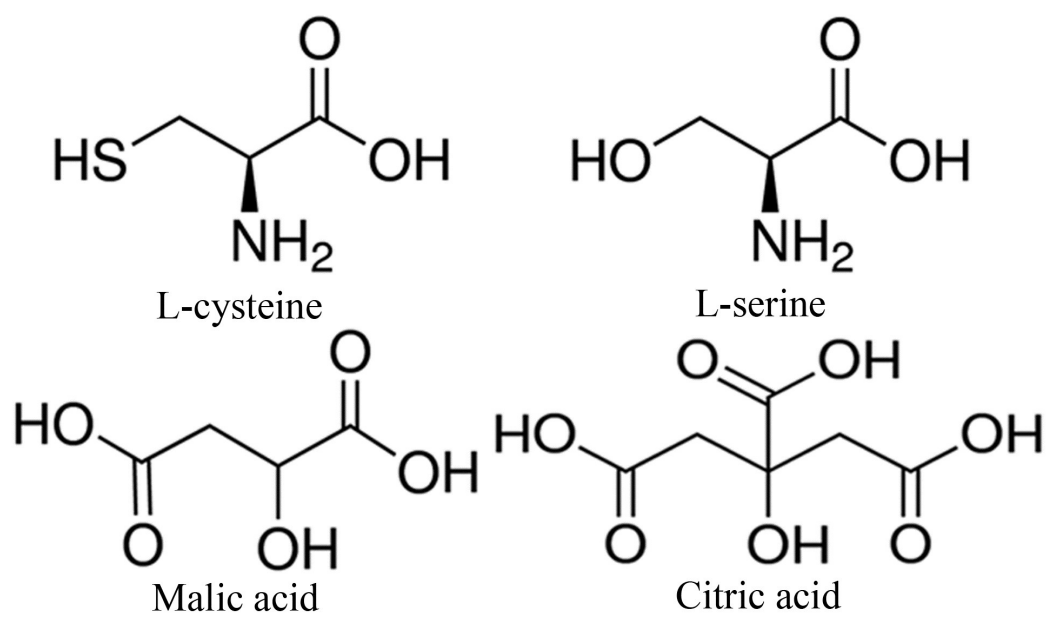

83

84 **Figure S6.** Chemical structural formulas of small-NOM models.

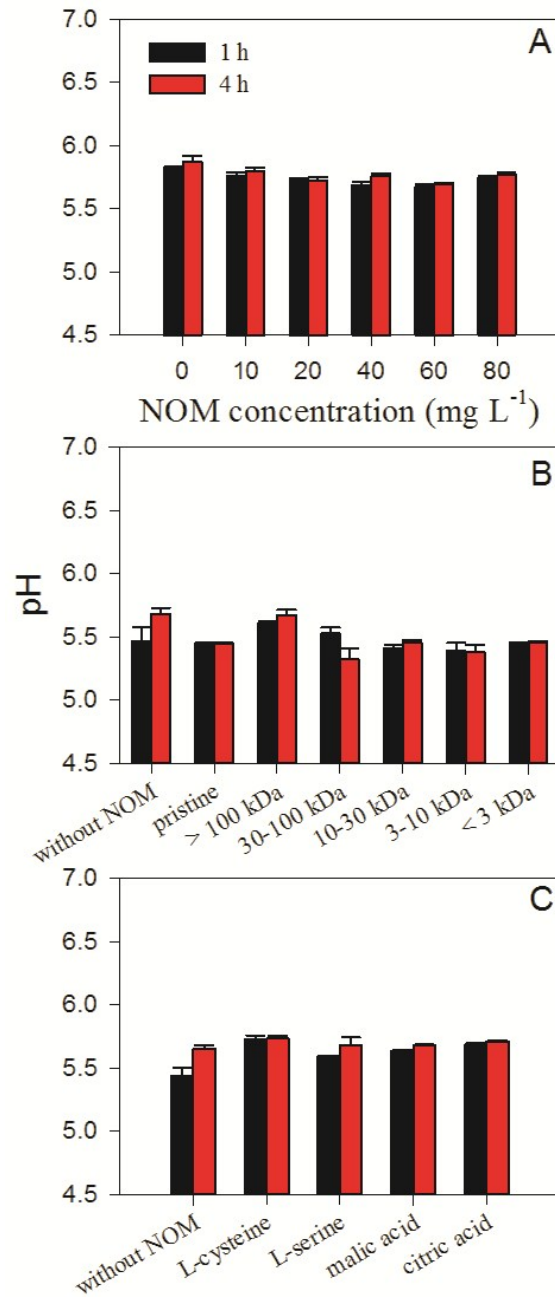

86

87 **Figure S7.** Effects of NOM concentration (A), NOM fractionation (B), and small-NOM models

88 (C) on the pH of the exposure medium. Exposure medium condition: 1 mg AgNPs L<sup>-1</sup> in 1/4

89 Hoagland's medium (pH 5.6 ± 0.1). The data are presented as the mean ± SD (n = 5).
